# Supplementary material for: New insights into the interplay between codon bias determinants in plants
Source: PubMed Central journal article supplement (PMC4675714; doi:10.1093/dnares/dsv027), 2015-11-05
Supplement: supp_dsv027_dsv027supp_table1.pdf [file supp_dsv027_dsv027supp_table1.pdf]

| Amino acid | Frequency | $r_{\text{exp}}$ |
|------------|-----------|------------------|
| A          | 6.16%     | 0.2877***        |
| C          | 2.02%     | -0.0682***       |
| D          | 5.14%     | -0.0455***       |
| E          | 6.38%     | -0.0845***       |
| F          | 4.33%     | -0.0322***       |
| G          | 6.32%     | 0.1705***        |
| H          | 2.23%     | -0.1005***       |
| I          | 5.27%     | -0.0143*         |
| K          | 6.42%     | 0.0477***        |
| L          | 9.12%     | -0.1023***       |
| M          | 2.59%     | -0.0208*         |
| N          | 4.27%     | -0.1409***       |
| P          | 4.80%     | 0.0469***        |
| Q          | 3.31%     | -0.036***        |
| R          | 5.39%     | -0.0877***       |
| S          | 9.26%     | -0.1556***       |
| T          | 5.07%     | 0.0531***        |
| V          | 6.60%     | 0.1116***        |
| W          | 1.23%     | -0.0638***       |
| Y          | 2.81%     | 0.0151*          |

**Table S1:** Relative abundance of amino acids in *A. thaliana* proteins as predicted from coding sequences and correlation with gene expression levels.
